# Supplementary material
Source: publisher figshare collection journal article supplement (https://karger.figshare.com/ndownloader/files/8718364)
Supplement: Supplementary file 1 [file 8718364]

| **Author** | **Patient selection** | **Number of patients** | **Indication for cholecystectomy** | **Overall conversion rate** |
| --- | --- | --- | --- | --- |
| Asai et al [7] | Patients with acute cholecystitis operated with laparoscopic cholecystectomies from January ’98 to December ‘12 | 225 | Acute cholecystitis | 12.9% |
| Harboe et al [11] | all patients from January ’06 to June ’09 in 33 different institutions | 20,053 | NA | 7.6% |
| Fuks et al [31] | patients with image verified acute cholecystitis | 108 | Acute cholecystitis | 22% |
| Hutchinson et al [33] | all patients from May ’90 to January ’93 operated by six general surgeons | 526 | Symptomatic cholecystolithiasis or acalculous gallbladders with typical biliary pain | 8.6% |
| Ibrahim et al [34] | All consecutive patients from May 1998 to May 2004 | 1000 | NA | 10.3% |
| Ishizaky et al [35] | All elective cholecystectomies from ’93 to ‘04 | 1179 | Biliary colic, acute cholecystitis, gallbladder polyp | 7.5% |
| Kanakala et al [38] | All laparoscopic cholecystectomies from ’98 to ‘07 | 2117 | Symptomatic cholecystolithiasis | 6.3% |
| Lee et al [39] | All laparoscopic cholecystectomies from January ’08 to December ‘09 | 346 | Both acute and elective cholecystectomies | 11.9% |
| Low et al [42] | Patients with acute cholecystitis operated with laparoscopic cholecystectomies from July ’03 to July ‘07 | 48 | Acute cholecystitis | 29.2% |
| Yajima et al [47] | All elective cholecystectomies from January ’98 to July ‘06 | 407 | Elective cholecystectomies | 11.5% |

Supplementary material

Details regarding studies included in meta-analysis
